# Supplementary material for: A Safety Review and Meta-Analyses of Bevacizumab and Ranibizumab: Off-Label versus Goldstandard
Source: PubMed Central journal article supplement (PMC3411814; doi:10.1371/journal.pone.0042701), 2012-08-03
Supplement: pone.0042701.s001.pdf [file pone.0042701.s001.pdf]

**Text S1      Search strategy in Medline (Ovid).**

1.      exp Randomized Controlled Trial/
2.      exp Controlled Clinical Trial/
3.      (randomized or randomised).ab.
4.      placebo.ab.
5.      clinical trials as topic.sh.
6.      randomly.ab.
7.      trial.ti.
8.      exp Random Allocation/
9.      1 or 2 or 3 or 4 or 5 or 6 or 7 or 8
10.     exp animals/ not humans.sh.
11.     9 not 10
12.     exp Macular Degeneration/
13.     exp Retinal Degeneration/
14.     exp Retinal Neovascularization/
15.     exp Choroidal Neovascularization/
16.     exp Macula Lutea/
17.     ((macul\* or retina\* or choroid\*) adj5 degener\*).mp. [mp=protocol supplementary concept, rare disease supplementary concept, title, original title, abstract, name of substance word, subject heading word, unique identifier]
18.     ((macul\* or retina\* or choroid\*) adj5 neovasc\*).mp. [mp=protocol supplementary concept, rare disease supplementary concept, title, original title, abstract, name of substance word, subject heading word, unique identifier]
19.     ((macul\* or retina\* or choroid\*) adj5 neo-vasc\*).mp. [mp=protocol supplementary concept, rare disease supplementary concept, title, original title, abstract, name of substance word, subject heading word, unique identifier]
20.     amd.mp. [mp=protocol supplementary concept, rare disease supplementary concept, title, original title, abstract, name of substance word, subject heading word, unique identifier]
21.     cnv.mp. [mp=protocol supplementary concept, rare disease supplementary concept, title, original title, abstract, name of substance word, subject heading word, unique identifier]
22.     (subfoveal neovasc\* or subfoveal neo-vasc\*).mp. [mp=protocol supplementary concept, rare disease supplementary concept, title, original title, abstract, name of substance word, subject heading word, unique identifier]

23. (extrafoveal neovasc\* or extrafoveal neo-vasc\*).mp. [mp=protocol supplementary concept, rare disease supplementary concept, title, original title, abstract, name of substance word, subject heading word, unique identifier]
24. (juxtafoveal neovasc\* or juxtafoveal neo-vasc\*).mp. [mp=protocol supplementary concept, rare disease supplementary concept, title, original title, abstract, name of substance word, subject heading word, unique identifier]
25. (occult neovasc\* or occult neo-vasc\*).mp. [mp=protocol supplementary concept, rare disease supplementary concept, title, original title, abstract, name of substance word, subject heading word, unique identifier]
26. (classic neovasc\* or classic neo-vasc\*).mp. [mp=protocol supplementary concept, rare disease supplementary concept, title, original title, abstract, name of substance word, subject heading word, unique identifier]
27. (chor\* neovasc\* or chor\* neo-vasc\*).mp. [mp=protocol supplementary concept, rare disease supplementary concept, title, original title, abstract, name of substance word, subject heading word, unique identifier]
28. 12 or 13 or 14 or 15 or 16 or 17 or 18 or 19 or 20 or 21 or 22 or 23 or 24 or 25 or 26 or 27
29. exp Diabetic Retinopathy/
30. exp Macular Edema/
31. exp Macular Degeneration/
32. (macular edema cystoid or macular oedema cystoid).mp. [mp=protocol supplementary concept, rare disease supplementary concept, title, original title, abstract, name of substance word, subject heading word, unique identifier]
33. (macula\* adj2 edema).mp. [mp=protocol supplementary concept, rare disease supplementary concept, title, original title, abstract, name of substance word, subject heading word, unique identifier]
34. (macula\* adj2 oedema).mp. [mp=protocol supplementary concept, rare disease supplementary concept, title, original title, abstract, name of substance word, subject heading word, unique identifier]
35. (DME or DMO).mp. [mp=protocol supplementary concept, rare disease supplementary concept, title, original title, abstract, name of substance word, subject heading word, unique identifier]
36. (CME or CSME).mp. [mp=protocol supplementary concept, rare disease supplementary concept, title, original title, abstract, name of substance word, subject heading word, unique identifier]
37. (CMO or CSMO).mp. [mp=protocol supplementary concept, rare disease supplementary concept, title, original title, abstract, name of substance word, subject heading word, unique identifier]

38. 29 or 30 or 31 or 32 or 33 or 34 or 35 or 36 or 37
39. exp Antibodies, Monoclonal/
40. monoclonal antibod\*.mp.
41. exp Angiogenesis Inhibitors/
42. angiogenesis inhibitor\*.mp.
43. exp Angiogenesis Inducing Agents/
44. angiogenesis inducing agent\*.mp.
45. exp Endothelial Growth Factors/
46. endothelial growth factor\*.mp.
47. exp Vascular Endothelial Growth Factor A/
48. vascular endothelial growth factor\*.mp.
49. (vegf or (anti adj2 vegf)).mp. [mp=protocol supplementary concept, rare disease supplementary concept, title, original title, abstract, name of substance word, subject heading word, unique identifier]
50. endo-GF.mp.
51. (bevacizumab or avastin).mp. [mp=protocol supplementary concept, rare disease supplementary concept, title, original title, abstract, name of substance word, subject heading word, unique identifier]
52. (ranibizumab or lucentis or rhufab).mp. [mp=protocol supplementary concept, rare disease supplementary concept, title, original title, abstract, name of substance word, subject heading word, unique identifier]
53. 39 or 40 or 41 or 42 or 43 or 44 or 45 or 46 or 47 or 48 or 49 or 50 or 51 or 52
54. 11 and 28 and 53
55. 11 and 38 and 53
56. 54 or 55
57. remove duplicates from 56
